# Supplementary material for: The regulatory role of aberrant Phosphatase and Tensin Homologue and Liver Kinase B1 on AKT/mTOR/c-Myc axis in pancreatic neuroendocrine tumors
Source: PubMed Central journal article supplement (PMC5716714; doi:10.18632/oncotarget.20956), 2017-09-16
Supplement: oncotarget-08-98068-s001.pdf [file oncotarget-08-98068-s001.pdf]

## The regulatory role of aberrant Phosphatase and Tensin Homologue and Liver Kinase B1 on AKT/mTOR/c-Myc axis in pancreatic neuroendocrine tumors

### SUPPLEMENTARY MATERIALS

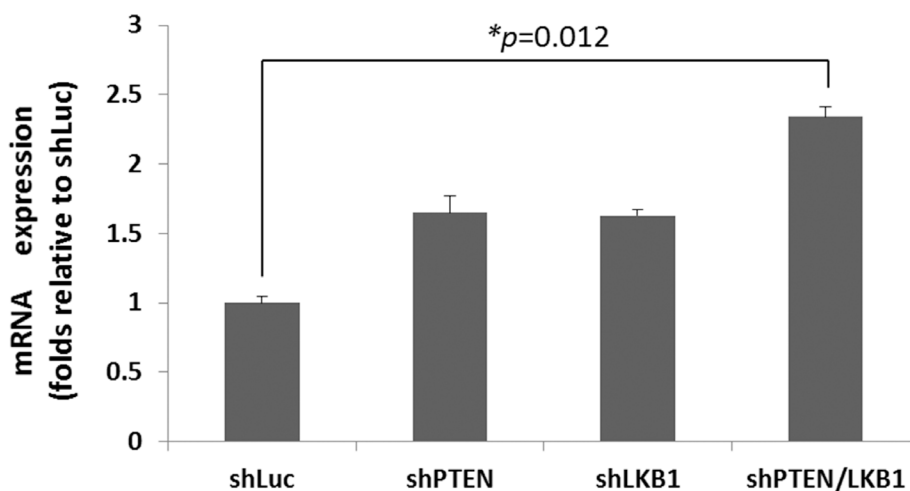

\*, QGP-1/shLuc vs QGP-1/shPTEN/LKB1,  $P=0.012$

Supplementary Figure 1: The mRNA expression of QGP-1/shLuc, QGP-1/shPTEN, QGP-1 shLKB1 and QGP-1/shPTEN/LKB1.

## QGP-1

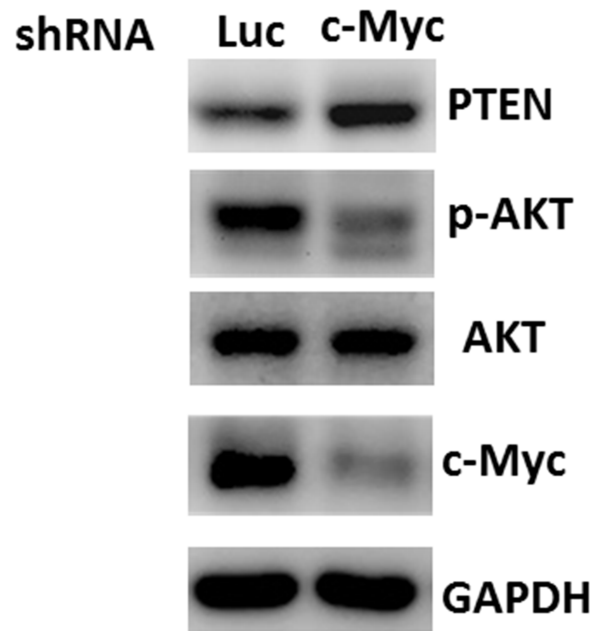

Supplementary Figure 2: The Protein expression of PTEN, AKT, c-Myc and phosphorylated AKT in QGP-1 cells with or without knockdown of c-Myc

**Supplementary Table 1: The demographics and expression status of PTEN, LKB1, and c-Myc in pNET patients**

| Case No. | Sex | Age | Grade | Stage | PTEN     | LKB1   | c-Myc   | Survival |
|----------|-----|-----|-------|-------|----------|--------|---------|----------|
| 1        | F   | 80  | 2     | IB    | C*, 1+   | C*, 1+ | N**, 2+ | alive    |
| 2        | M   | 53  | 1     | IA    | C, 1+    | C, 2+  | N, 2+   | dead     |
| 3        | M   | 45  | 2     | IV    | C, 1+    | C, 2+  | N, 2+   | alive    |
| 4        | M   | 67  | 1     | IA    | C, 1+    | C, 2+  | N, 2+   | alive    |
| 5        | M   | 52  | 2     | IV    | C, 2+    | C, 3+  | N, 2+   | alive    |
| 6        | M   | 54  | 1     | IV    | C, 2+    | C, 2+  | N, 2+   | alive    |
| 7        | F   | 47  | 1     | IA    | C, 1+    | C, 1+  | N, 1+   | alive    |
| 8        | M   | 71  | 1     | IIB   | C, 1+    | C, 2+  | N, 2+   | alive    |
| 9        | M   | 42  | 2     | IV    | Negative | C, 1+  | N, 2+   | alive    |
| 10       | M   | 34  | 2     | IV    | C, 1+    | C, 2+  | N, 3+   | alive    |
| 11       | M   | 61  | 2     | IV    | C, 3+    | C, 3+  | N, 3+   | alive    |
| 12       | F   | 62  | 1     | IV    | C, 1+    | C, 2+  | N, 2+   | alive    |
| 13       | M   | 45  | 1     | IB    | C, 2+    | C, 3+  | N, 1+   | alive    |
| 14       | F   | 54  | 1     | IB    | C, 2+    | C, 3+  | N, 2+   | alive    |
| 15       | M   | 48  | 1     | IB    | C, 2+    | C, 3+  | N, 3+   | dead     |
| 16       | F   | 73  | 1     | IIA   | C, 2+    | C, 1+  | N, 1+   | alive    |
| 17       | M   | 73  | 1     | IA    | C, 1+    | C, 1+  | N, 3+   | alive    |
| 18       | M   | 21  | 2     | IA    | C, 3+    | C, 3+  | N, 3+   | alive    |
| 19       | F   | 62  | 1     | IA    | C, 3+    | C, 3+  | N, 2+   | alive    |
| 20       | F   | 39  | 1     | IA    | C, 3+    | C, 3+  | N, 2+   | alive    |
| 21       | M   | 32  | 2     | IV    | C, 2+    | C, 2+  | N, 1+   | alive    |

\*C, cytoplasm; \*\*N, nucleus.

**Supplementary Table 2: The correlation between PTEN, LKB1, or c-Myc with clinical characteristics**

|          | PTEN         |              | <i>P</i> * | LKB1         |              | <i>P</i> * | c-Myc        |              | <i>P</i> * |
|----------|--------------|--------------|------------|--------------|--------------|------------|--------------|--------------|------------|
|          | Low          | High         |            | Low          | High         |            | Low          | High         |            |
|          | <i>N</i> (%) | <i>N</i> (%) |            | <i>N</i> (%) | <i>N</i> (%) |            | <i>N</i> (%) | <i>N</i> (%) |            |
| Sex      |              |              |            |              |              |            |              |              |            |
| F        | 3 (30.0)     | 4 (36.4)     | 1          | 3 (60.0)     | 4 (25.0)     | 0.28       | 2 (50.0)     | 5 (29.4)     | 0.57       |
| M        | 7 (70.0)     | 7 (63.6)     |            | 2 (40.0)     | 12 (70.0)    |            | 2 (50.0)     | 12 (70.6)    |            |
| Age      |              |              |            |              |              |            |              |              |            |
| < 60     | 5 (50.0)     | 8 (72.7)     | 0.39       | 2 (40.0)     | 11 (68.8)    | 0.33       | 3 (75.0)     | 10 (58.8)    | 1          |
| >= 60    | 5 (50.0)     | 3 (27.3)     |            | 3 (60.0)     | 5 (31.2)     |            | 1 (25.0)     | 7 (41.2)     |            |
| Grade    |              |              |            |              |              |            |              |              |            |
| I        | 6 (60.0)     | 7 (63.6)     | 1          | 3 (60.0)     | 10 (62.5)    | 1          | 3 (75.0)     | 10 (58.8)    | 1          |
| II       | 4 (40.0)     | 4 (36.4)     |            | 2 (40.0)     | 6 (37.5)     |            | 1 (25.0)     | 7 (41.2)     |            |
| Stage    |              |              |            |              |              |            |              |              |            |
| I + II   | 6 (60.0)     | 7 (63.6)     | 1          | 4 (80.0)     | 9 (56.3)     | 0.61       | 3 (75.0)     | 10 (58.8)    | 1          |
| IV       | 4 (40.0)     | 4 (36.4)     |            | 1 (20.0)     | 7 (43.7)     |            | 1 (25.0)     | 7 (41.2)     |            |
| Survival |              |              |            |              |              |            |              |              |            |
| No       | 1 (10.0)     | 1 (9.1)      | 1          | 0 (0.0)      | 2 (12.5)     | 1          | 0 (0.0)      | 2 (11.8)     | 1          |
| Yes      | 9 (90.0)     | 10 (90.9)    |            | 5 (100.0)    | 14 (87.5)    |            | 4 (100.0)    | 15 (88.2)    |            |

\*The *P* value was generated by Fisher's Exact Test.

**Supplementary Table 3: The correlation among PTEN, LKB1 and c-Myc expression in pNETs**

|       | PTEN         |              | <i>P</i> * |
|-------|--------------|--------------|------------|
|       | Low          | High         |            |
|       | <i>N</i> (%) | <i>N</i> (%) |            |
| LKB1  |              |              |            |
| Low   | 4 (40.0)     | 1 (9.1)      | 0.15       |
| High  | 6 (60.0)     | 10 (90.9)    |            |
| c-Myc |              |              |            |
| Low   | 1 (10.0)     | 3 (27.3)     | 0.59       |
| High  | 9 (90.0)     | 8 (72.7)     |            |
|       | LKB1         |              | <i>P</i> * |
|       | Low          | High         |            |
|       | <i>N</i> (%) | <i>N</i> (%) |            |
| c-Myc |              |              |            |
| Low   | 2 (40.0)     | 2 (12.5)     | 0.23       |
| High  | 3 (60.0)     | 14 (87.5)    |            |

\**P* was generated by Fisher's Exact Test

**Supplementary Table 4: The demographics, expression status of PTEN, LKB1, and c-Myc and response to everolimus in pNET patients**

| <b>case No.</b> | <b>sex</b> | <b>age</b> | <b>Grade</b> | <b>stage</b> | <b>PTEN</b> | <b>LKB1</b> | <b>c-Myc</b> | <b>survival</b> | <b>response to everolimus</b> |
|-----------------|------------|------------|--------------|--------------|-------------|-------------|--------------|-----------------|-------------------------------|
| 3               | M          | 45         | II           | IV           | 1+          | 2+          | 2+           | alive           | yes                           |
| 6               | M          | 54         | I            | IV           | 2+          | 2+          | 2+           | alive           | yes                           |
| 10              | M          | 34         | II           | IV           | 1+          | 2+          | 3+           | alive           | no                            |
| 11              | M          | 61         | II           | IV           | 3+          | 3+          | 3+           | alive           | no                            |
| 12              | F          | 62         | I            | IV           | 1+          | 2+          | 2+           | alive           | yes                           |
